# Supplementary material for: Assessing the impact of AGS-004, a dendritic cell-based immunotherapy, and vorinostat on persistent HIV-1 Infection
Source: PubMed Central journal article supplement (PMC7083965; doi:10.1038/s41598-020-61878-3), 2020-03-20
Supplement: 41598_2020_61878_MOESM1_ESM.pdf [file 41598_2020_61878_MOESM1_ESM.pdf]

**Supplementary material for:**

**Assessing the impact of AGS-004, a dendritic cell-based immunotherapy, and vorinostat on persistent HIV-1 Infection**

Cynthia L. Gay<sup>1,2</sup>, Joann D. Kuruc<sup>1,2</sup>, Shane D. Falcinelli<sup>1,3</sup>, Joanna A. Warren<sup>1,3</sup>, Sarah A. Reifeis<sup>4</sup>, Jennifer L. Kirchherr<sup>1</sup>, Katherine S. James<sup>1</sup>, Morgan G. Dewey<sup>1</sup>, Alyson Helms<sup>1,2</sup>, Brigitte Allard<sup>1</sup>, Erin Stuelke<sup>1</sup>, Alicia Gamble<sup>7</sup>, Ana Plachco<sup>7</sup>, Robert J. Gorelick<sup>6</sup>, Joseph J. Eron<sup>1,2,5</sup>, Michael Hudgens<sup>4</sup>, Carolina Garrido<sup>1,2</sup>, Nilu Goonetilleke<sup>1,3</sup>, Mark A. DeBenedette<sup>7</sup>, Irina Y. Tcherepanova<sup>7</sup>, Charles A. Nicolette<sup>7</sup>, Nancie M. Archin<sup>1,2</sup>, and David M. Margolis<sup>1,2,3,5\*</sup>

University of North Carolina HIV Cure Center<sup>1</sup>, UNC Institute of Global Health and Infectious Diseases, Departments of Medicine<sup>2</sup> and Microbiology and Immunology<sup>3</sup>, UNC Chapel Hill School of Medicine, Department of Biostatistics<sup>4</sup> and Epidemiology<sup>5</sup>, UNC Chapel Hill School of Public Health, University of North Carolina at Chapel Hill, Chapel Hill, North Carolina, AIDS and Cancer Virus Program<sup>6</sup>, Frederick National Laboratory for Cancer Research, Frederick, MD, and Argos Therapeutics<sup>7</sup>, Durham, North Carolina, USA.

\*Correspondence should be addressed to:

David Margolis MD  
Phone (919)-966-6388  
[dmargo@med.unc.edu](mailto:dmargo@med.unc.edu)

**Table S1.** Effect of AGS-004 and VOR on residual viremia (HIV copies/ml)

| <b>PID</b> | <b>Baseline</b> | <b>Cycle I*</b>     | <b>Cycle II</b> | <b>Post-study</b> |
|------------|-----------------|---------------------|-----------------|-------------------|
| VV-01      | 0.4             | 0.49; 0.63          | 1.1             | 0.34              |
| VV-02      | 4.3             | 0.42; 0.34          | BLD             | 0.29              |
| VV-03      | 0.15            | BLD; 0.14           | 0.55            | 0.5               |
| VV-04      | 0.2             | 0.55; 0.18          | 0.47            | 0.45              |
| VV-06      | 3               | 12; 84 <sup>Ψ</sup> | 0.17            | 19                |

*BLD: below the limit of detection*

*\* Visits 14 and 17 respectively*

*Ψ Documented episode of blips*

**Table S2.** Participant resting cell infection (infected cells/million resting CD4+ T cells with 95% Confidence Interval)

| <b>Participant ID</b> | <b>Baseline</b>      | <b>After 2<sup>nd</sup> cycle</b> |
|-----------------------|----------------------|-----------------------------------|
| VV-01                 | 0.315 (0.187, 0.525) | 0.258 (0.138, 0.447)              |
| VV-02                 | 1.035 (0.612, 2.256) | 0.591 (0.323, 1.106)              |
| VV-03                 | 0.544 (0.313, 0.947) | 0.527 (0.304, 0.927)              |
| VV-04                 | 1.042 (0.648, 2.011) | 1.260 (0.780, 2.512)              |
| VV-06                 | 0.326 (0.146, 0.672) | 0.390 (0.217, 0.697)              |

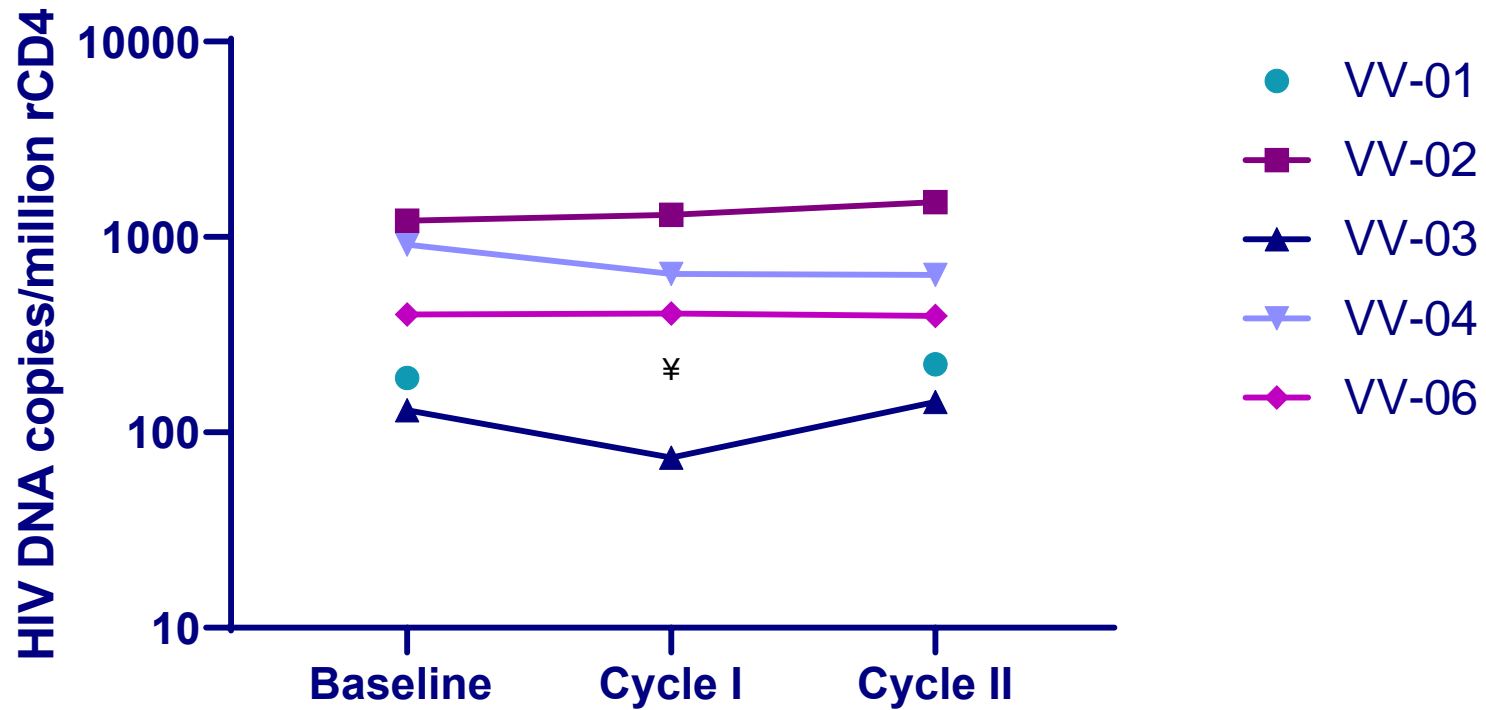

**Supplementary Figure 1. No significant changes in total HIV DNA after AGS-004 and VOR administration.** Cell associated HIV DNA was measured in 5 million resting CD4+ T cells for each time point shown by ddPCR. The gene RPP30 was used as a reference to normalized to copies/million. ¥, samples for this time point not available.

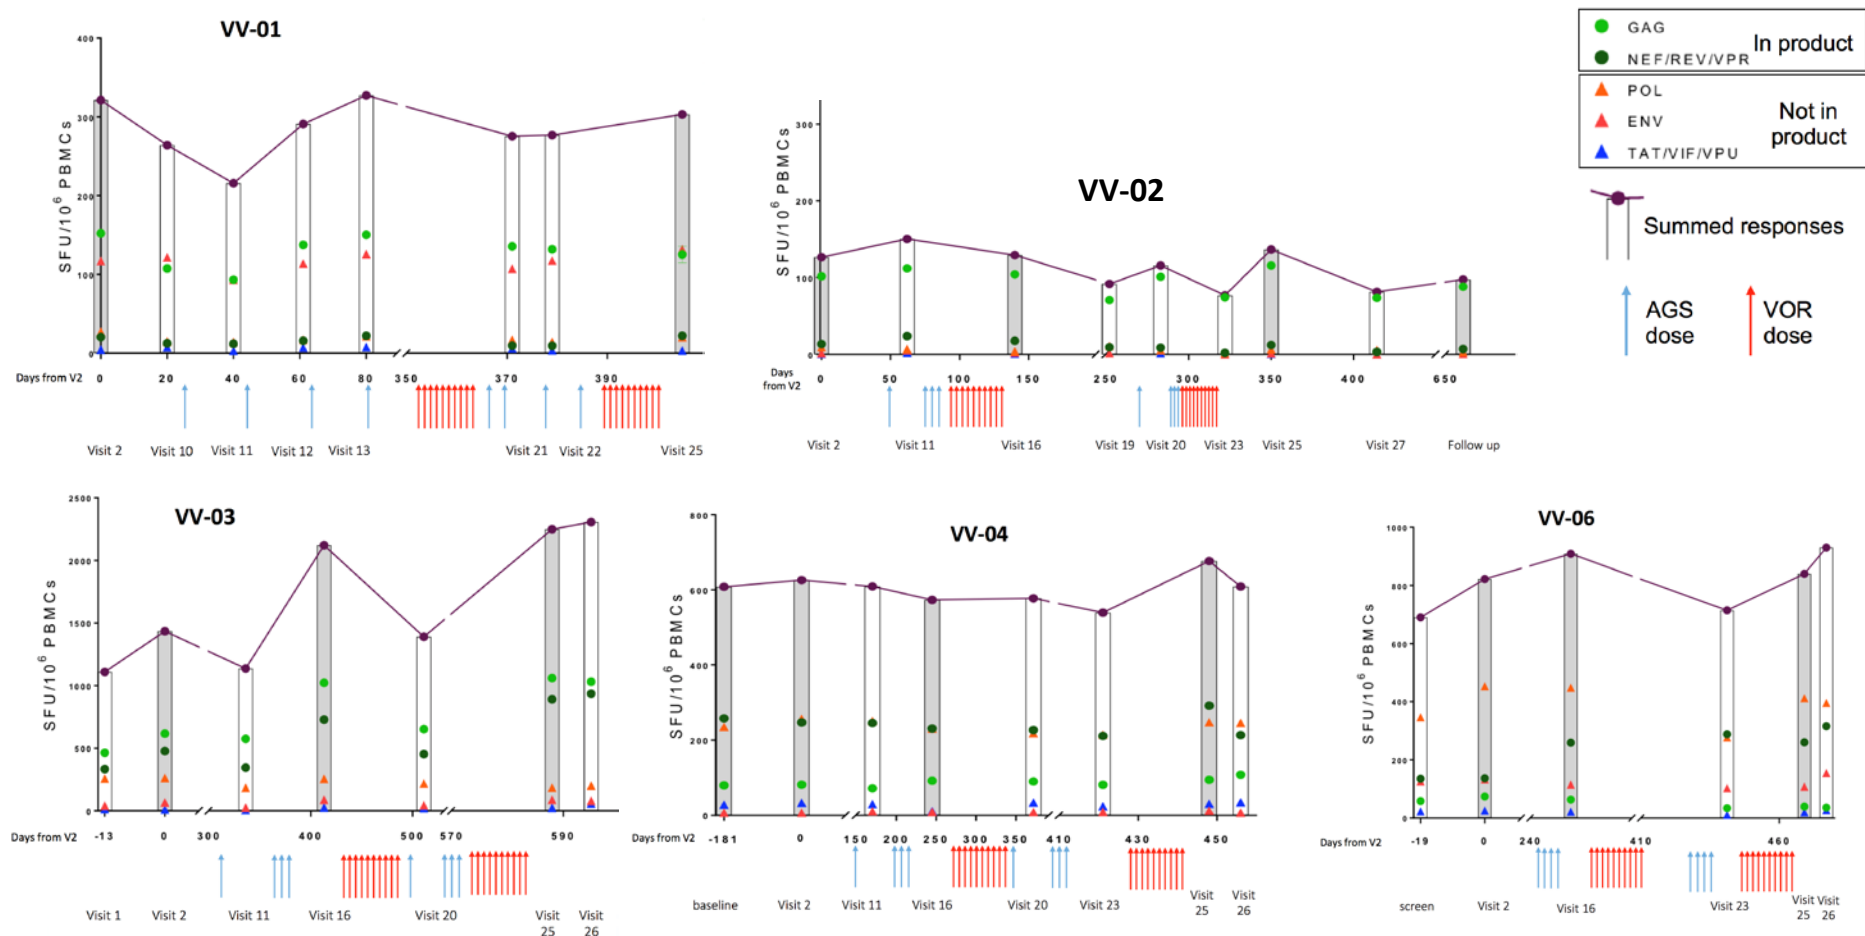

**Supplementary Figure 2. T cell response to HIV proteins before and after VOR and AGS-004 dosing.** Cryopreserved PBMCs were thawed, rested overnight, added to ELISpot plates containing peptide pools representing proteins within the AGS-004 vaccine (Gag, Nef-Rev-Vpr), and others not in the vaccine (Env, Pol, Tat-Vif-Vpu and incubated overnight. Media and PHA were used as negative and positive controls respectively. Detection and enumeration of IFN- $\gamma$  producing cells in response to peptide stimulation was quantitated by ELISpot assay. Positive T cell responses were defined as  $\geq 12.5$  SFU per million,  $> 4$  times the average of replicate background wells. The AGS-004 vaccine induced T cell responses in *ex vivo* ELISpot in participant VV-03 only. Grey bars indicate PBMC from leukapheresis products; white bars indicate PBMC from whole blood.

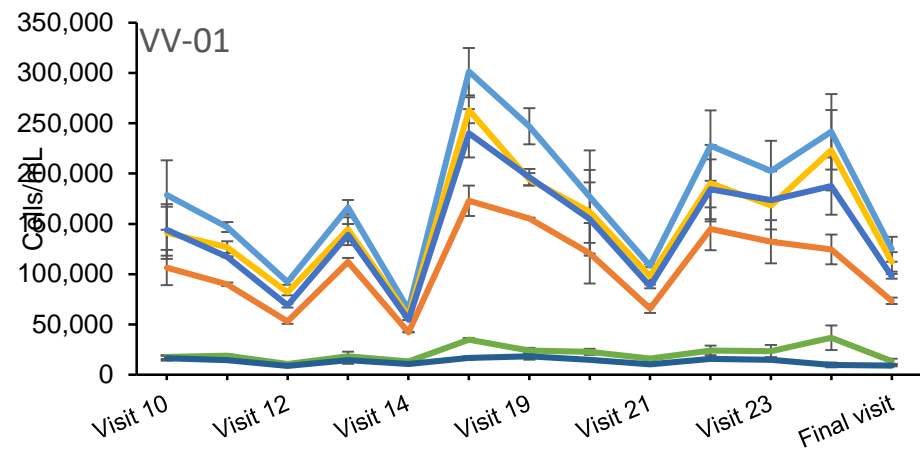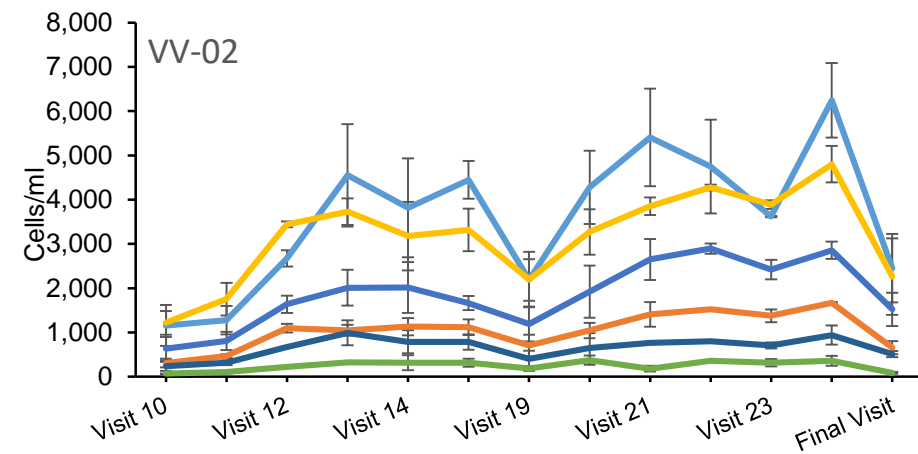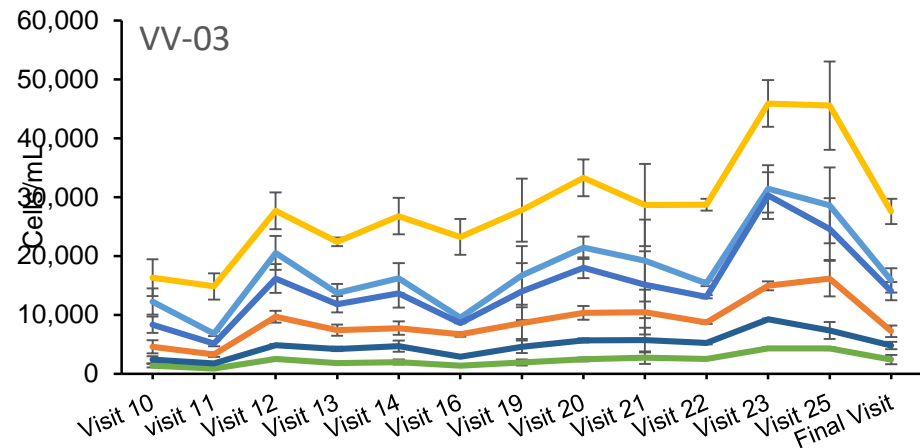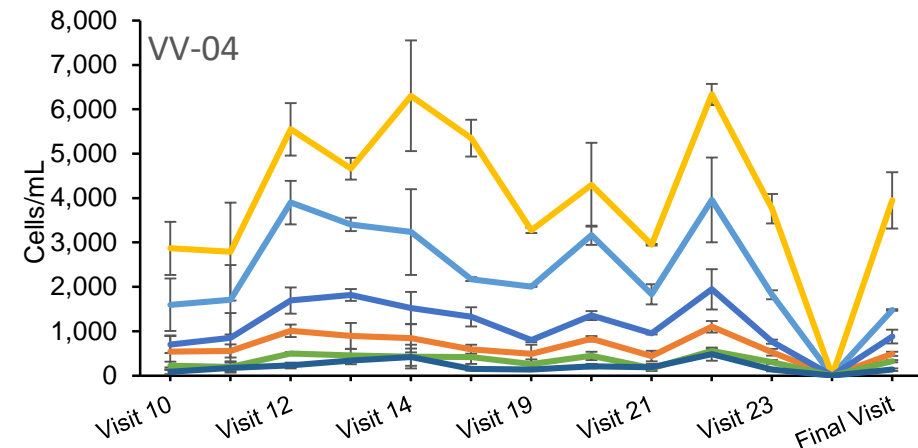

**Supplementary Figure 3. Proliferative and cytokine responses in CD28<sup>+</sup>/CD45RA<sup>-</sup> CD8<sup>+</sup> Memory CTLs during combination therapy.**

PBMCs, from whole blood collected at the indicated visits, were cultured with autologous DCs. The number (cells/mL) of proliferating cells or cells expressing CD107a, GrB, IFN- $\gamma$ , IL-2, or TNF- $\alpha$  were determined from CD28<sup>+</sup>/CD45RA<sup>-</sup> CD8<sup>+</sup> T-cell subset. Each functional marker is represented by the following symbols BrdU ■, CD107a ■, Grb ■, IFN- $\gamma$  ■, IL-2 ■, and TNF- $\alpha$  ■. Cells/mL values were determined by the average of triplicate cultures. Visit 10 designates the time prior to administration of AGS-004.

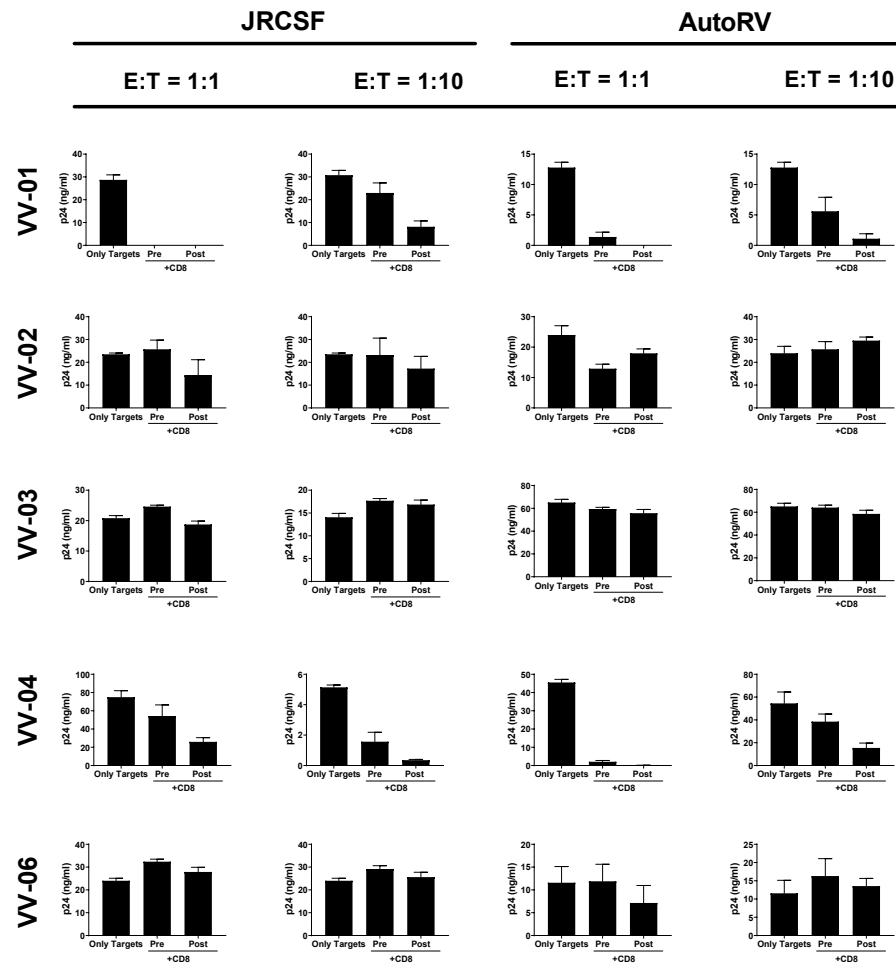

**Supplemental Figure 4. Non-normalized data from viral inhibition assays using isolated CD8+T cells from each of the participants before and after the clinical treatment.** CD8 depleted PBMCs were stimulated with PHA and infected with either the viral strain JRCSF or autologous reservoir virus (AutoRV), and then CD8+T cells were added at E:T ratio of 1:1 or 1:10. Viral replication was assessed in the supernatant after 6 days of culture by HIV gag p24 ELISA.
